# Supplementary material for: Neurotoxicity mechanisms of per- and polyfluoroalkyl substances: An integrated study of network toxicology, molecular docking, and Mendelian randomization
Source: Research Square preprint supplement (doi:10.21203/rs.3.rs-7781031/v1), 2025-10-23
Supplement: Supplementary file 1 [file 18430295ac307ce43c4caab9.xlsx]

## Sheet: Table S1
Table S1. Characteristics of 24 SNPs associated with PFOA.
SNP	effect allele	other allele	eaf	beta	se	pval
rs17124071	G	A	0.321663	-0.0735267	0.0162805	6.29e-06
rs34427182	T	A	0.0662628	0.142431	0.0299745	2.02e-06
rs3795737	C	T	0.0586009	-0.156771	0.0321238	1.06e-06
rs114686372	C	T	0.0240596	0.249581	0.048763	3.08e-07
rs9809948	G	C	0.0634027	0.137473	0.0306925	7.5e-06
rs931382	G	A	0.544864	0.0676043	0.0150151	6.72e-06
rs7668556	G	A	0.540948	-0.0665836	0.0150517	9.7e-06
rs45499402	C	G	0.109162	0.12728	0.023968	1.09e-07
rs3822433	C	T	0.662558	0.0701088	0.0157556	8.6e-06
rs2306053	G	A	0.138958	-0.0967084	0.0218419	9.53e-06
rs9501929	C	T	0.0471814	-0.176552	0.0356929	7.56e-07
rs396050	C	T	0.743987	-0.080834	0.0172189	2.67e-06
rs75640656	G	A	0.0263448	-0.211358	0.0461935	4.75e-06
rs7788282	C	G	0.092147	0.117256	0.0256833	4.98e-06
rs116914058	C	G	0.0429134	0.165798	0.0371703	8.18e-06
rs74811952	C	T	0.0240069	-0.220329	0.0494061	8.21e-06
rs62541425	A	G	0.0520049	0.156687	0.0337694	3.49e-06
rs9420708	C	G	0.535641	0.0710823	0.0152491	3.14e-06
rs182036014	T	C	0.01188	-0.345309	0.0695354	6.84e-07
rs2369463	C	T	0.163674	-0.0932527	0.0204641	5.19e-06
rs71439517	C	T	0.00763547	-0.391551	0.0866218	6.18e-06
rs6572264	C	A	0.60055	-0.0686195	0.0152974	7.27e-06
rs7219584	C	T	0.0568793	0.163608	0.0319824	3.13e-07
rs113579942	A	G	0.0353491	0.195539	0.0410745	1.93e-06

## Sheet: Table S2
Table S2. Characteristics of 24 SNPs associated with PFOS.
SNP	effect allele	other allele	eaf	beta	se	pval
rs12095065	G	A	0.0602321	-0.132235	0.0298203	9.23e-06
rs71439202	C	T	0.031208	-0.181282	0.0406823	8.35e-06
rs60412748	C	T	0.0173802	0.244662	0.0542929	6.6e-06
rs141471965	T	C	0.109677	0.146375	0.0226339	9.99e-11
rs6935886	C	T	0.0157663	0.264287	0.0569224	3.43e-06
rs73695648	A	C	0.041384	-0.163452	0.0360943	5.94e-06
rs117339273	T	C	0.0145446	0.270398	0.0591484	4.84e-06
rs117098421	A	G	0.0158134	0.26461	0.0574919	4.17e-06
rs704016	T	C	0.167227	-0.0859732	0.0193311	8.69e-06
rs117272002	T	G	0.00037281	-1.68822	0.370417	5.17e-06
rs57965817	G	A	0.126754	-0.0977931	0.0213469	4.62e-06
rs142384244	C	T	0.0210604	0.226005	0.0496652	5.35e-06
rs142317920	A	G	0.0343488	0.181309	0.0396844	4.91e-06
rs72771661	G	A	0.0454212	-0.161821	0.0338777	1.78e-06
rs117568662	A	G	0.0359549	-0.186013	0.0384317	1.3e-06
rs12607820	A	C	0.657138	-0.0707871	0.0150679	2.63e-06
rs117814140	T	A	0.0231374	-0.210875	0.0473117	8.31e-06
rs117249960	A	G	0.081305	-0.121448	0.0265414	4.74e-06
rs62120427	T	C	0.073071	0.126367	0.0279803	6.29e-06
rs143450669	G	A	0.00281139	-0.59981	0.134113	7.73e-06
rs6044671	T	G	0.102903	0.107248	0.0232767	4.07e-06
rs73164873	T	C	0.0728822	-0.124823	0.0270805	4.04e-06
rs9614577	G	C	0.0425493	-0.155337	0.0347871	7.99e-06
rs112932931	A	C	0.0261674	-0.208243	0.044431	2.77e-06

## Sheet: Table S3
Table S3. 223 elements related to "PFOA and PFOS".
Gene name
SLC27A1
RXRA
UGT1A4
KAT2A
FFAR1
GABRB3
GABRA5
GABRA4
GABRB2
PANK1
SCD
DAO
AKR1C2
ANP32A
SLC6A15
SLC27A5
FABP4
GABRA6
EIF4EBP1
PPIP5K2
GABRG2
HCAR1
RARA
RXRB
KCNK4
SLC1A5
GABRA1
ALOX5
GRIK2
HAAO
RARB
GRIK1
SLC7A11
EIF4E
GCN1
FA2H
SLC1A2
PCSK6
AR
GRIK5
FABP3
SMPD1
FAAH
GABRA3
AKR1C1
FGF1
ASAH1
FASN
FFAR3
GBA2
LPAR2
FABP1
CYP26B1
GAD1
CD36
APEH
PCBP1
SLC23A2
GABARAPL2
DNASE2
FABP5
GLB1
FURIN
FADS2
SLC27A4
FOLH1
GABARAP
GABRR1
VDR
GPRC5B
GABBR1
GSTO1
GBA1
DDC
NCOR2
GABRR2
GABRD
IL4I1
TAOK1
BCAT2
ACSL1
PARK7
PPARG
FADS1
OAT
TAOK2
NMNAT1
CYP3A4
SLC7A5
GIGYF2
HDAC3
ELOVL4
ALKBH1
ACSL4
ASIC3
ALOX15
GSTO2
SLC1A1
SLC1A4
TAOK3
SLC10A2
KAT2B
HMMR
SLC17A5
CYP26A1
HDAC1
KLRK1
SLC1A3
GABRB1
ASIC1
FABP2
PRDX6
BCKDHB
HPD
GABRA2
CD33
KCNK3
PRAP1
RARG
PANK3
GRIK3
GOT2
RPLP2
MAN2B1
ELOVL7
CRBN
ACSL3
HDAC2
PIPOX
PANK2
GABBR2
PPIP5K1
ACSL6
MDH1
GABARAPL1
TACC3
LIPA
ALAD
LPAR1
ACP1
ORM1
NAAA
FABP7
ELOVL5
GAD2
ELOVL1
CD22
AGPAT2
SLC7A3
BCAT1
GAA
ERBB2
SLC10A1
RPSA
KCNK9
GPBAR1
TYRP1
MGAM
NR1H4
SHBG
SLC7A8
RXRG
ALOX15B
SLC43A1
LPAR4
CYP4F2
SIGLEC9
PLAAT4
ACSL5
FFAR4
SLC27A2
MEP1A
MEP1B
SLC6A14
LPAR3
SIAE
AGPAT1
CYP2J2
SIGLEC7
WDHD1
SLC36A1
GPRC5C
CYP4A11
CYP4F3
DHX29
FABP6
GPR31
GPRC5A
UGT2B4
GPR35
CRABP2
ELOVL3
ADSS2
LPAR6
ELOVL2
HCAR3
GPAT4
KCNK5
LPAR5
SIGLEC8
SIGLEC10
SIGLEC14
ANP32B
GBA3
CHIA
FABP9
ALOX12
FAAH2
NAALAD2
CRABP1
SIGLEC15
ORM2
LY6E
HAO2
FFAR2
ELOVL6
GPAT3
KCNK17
HCAR2
ACP3
SLC22A9
SLC23A1
CYP4F11

## Sheet: Table S4
Table S4. 9351 elements related to "Brain damage".
Gene name
SLC27A1
RXRA
UGT1A4
KAT2A
FFAR1
GABRB3
GABRA5
GABRA4
GABRB2
PANK1
SCD
DAO
AKR1C2
ANP32A
SLC6A15
SLC27A5
FABP4
GABRA6
EIF4EBP1
PPIP5K2
GABRG2
HCAR1
RARA
RXRB
KCNK4
SLC1A5
GABRA1
ALOX5
GRIK2
HAAO
RARB
GRIK1
SLC7A11
EIF4E
GCN1
FA2H
SLC1A2
PCSK6
AR
GRIK5
FABP3
SMPD1
FAAH
GABRA3
AKR1C1
FGF1
ASAH1
FASN
FFAR3
GBA2
LPAR2
FABP1
CYP26B1
GAD1
CD36
APEH
PCBP1
SLC23A2
GABARAPL2
DNASE2
FABP5
GLB1
FURIN
FADS2
SLC27A4
FOLH1
GABARAP
GABRR1
VDR
GPRC5B
GABBR1
GSTO1
GBA1
DDC
NCOR2
GABRR2
GABRD
IL4I1
TAOK1
BCAT2
ACSL1
PARK7
PPARG
FADS1
OAT
TAOK2
NMNAT1
CYP3A4
SLC7A5
GIGYF2
HDAC3
ELOVL4
ALKBH1
ACSL4
ASIC3
ALOX15
GSTO2
SLC1A1
SLC1A4
TAOK3
SLC10A2
KAT2B
HMMR
SLC17A5
CYP26A1
HDAC1
KLRK1
SLC1A3
GABRB1
ASIC1
FABP2
PRDX6
BCKDHB
HPD
GABRA2
CD33
KCNK3
PRAP1
RARG
PANK3
GRIK3
GOT2
RPLP2
MAN2B1
ELOVL7
CRBN
ACSL3
HDAC2
PIPOX
PANK2
GABBR2
PPIP5K1
ACSL6
MDH1
GABARAPL1
TACC3
LIPA
ALAD
LPAR1
ACP1
ORM1
NAAA
FABP7
ELOVL5
GAD2
ELOVL1
CD22
AGPAT2
SLC7A3
BCAT1
GAA
ERBB2
SLC10A1
RPSA
KCNK9
GPBAR1
TYRP1
MGAM
NR1H4
SHBG
SLC7A8
INTS11
RERE
DDI2
EPHB2
HNRPR
MFSD2A
HPDL
POMGNT1
RAB3B
NFIA
DDIT1
GSTM3
DRAM2
PRUNE1
CCT3
NAXE
DARS2
EXOC8
B3GALNT2
TRAPPC12
BCYRN1
PPP1R21
CTNNA2
EN1
SMPD4
KIF5C
TBR1
SLC4A10
DYNC1I2
PGAP1
FARSB
GBX2
GRM7
XPC
POMGNT2
PTPN23
RHOA
DAG1
GMPPB
EEFSEC
ZIC1
NRROS
DDIT4L
AFG2A
CLCN3
ADCY2
BASP1
LMBRD2
KIF2A
CAMK4
APC
CSF1R
TUBB2A
TUBB2B
MDC1
TUBB
PANDAR
TAF8
CNR1
REPS1
DLL1
CRPPA
IL6
ADCY1
STX1A
BRI3
GBX1
RHEB
POMK
BAALC
ADCY8
MPDZ
PLAA
GADD45G
FKTN
GOLGA2
CRAT
POMT1
CAMSAP1
PTGDS
HK1
DDIT4
ANXA11
PI4K2A
DMBT1
DBX1
BDNF
DDB2
DDB1
FTH1
KAT5
B4GAT1
LIPT2
DDIAS
MED17
DDI1
TRAPPC4
BSX1
JAM3
LMO3
KRAS
PPFIBP1
DBX2
SHMT2
DDIT3
RXYLT1
PPP1R12A
DRAM1
DHX37
WBP4
COL4A1
COL4A2
NAXD
TRAPPC6B
POMT2
CKBE
WARS1
BEGAIN
DYNC1H1
CKB
KIF26A
CHASERR
MAPK8IP3
ADGRG1
BEAN1
MC1R
TUBB3
WDR81
MED11
SNORD118
SEBOX
NSRP1
ATP6V0A1
COASY
TUBG1
UBTF
EXOC7
RAC3
WDR45B
TBCD
APC2
ADAT3
GADD45B
FARSA
GADD45GIP1
NACC1
COLGALT1
BORCS8
C19orf12
EXOSC5
SMG9
EXOC3L2
NOVA2
FKRP
FTL
U2AF2
PYGB
PDRG1
PIGU
NORAD
BCAS1
WDR4
LARGE1
PLA2G6
WDR45
SMC1A
MAGEE1
BEX1
BEX2
TP53
ATM
MAPT
PSEN1
BDNF-AS
APP
PIK3CA
GLUL
PTEN
GFAP
APOE
EGFR
BRCA1
SLC2A1
TSPAN1
PRKN
XPA
SNCA
CHEK2
CTNNB1
NPPB
BRAF
SMC3
ATR
BRCA2
SOD1
SMARCB1
VCP
TNF
PARP1
POLG
NBN
IDH1
AKT1
PRKDC
NTRK2
TSC2
CHEK1
IDH2
NF1
ERCC2
GADD45A
PTPN11
PCNA
PLP1
PRNP
NOTCH3
PIK3R1
RAD51
TREX1
TSC1
MTOR
MTHFR
BMP4
TH
ATP13A2
RAD21
GCDH
CACNA1A
CP
ACTB
CDKN1A
TUBA1A
GALC
SQSTM1
NKX2-1
XRCC1
TARDBP
MCPH1
TGFB1
MDM2
LMNA
FMR1
BCL2
HTT
MRE11
CASP3
LAMA2
H3-3A
NRAS
MECP2
SPG11
AKT3
FANCD2
SLC6A3
ABCB1
GRIN2B
SCN1A
DCX
MGMT
ERCC6
MSH2
LRRK2
PSAP
FOXG1
CDK5
FGFR1
ALK
MSH6
TERT
SPTAN1
SETX
PDGFRB
PNKP
S100B
PAFAH1B1
ATRIP
MLH1
COMT
ATP7B
FUS
TBCE
IL10
ASPA
RELN
MYC
SOX10
CBS
CDKN2A
GRN
MBP
TP53BP1
BACE1
AARS2
SCN2A
PINK1
PSEN2
FGFR2
SDHA
IFNG
ERCC5
ARSA
FAS
ENO2
RNASEH2C
TREM2
CAT
DARS1
ERCC3
SYP
ERCC4
SLC6A4
OCLN
MFN2
ABL1
RRM2B
EP300
HSPD1
GLA
H2AX
INS
CREBBP
NPC1
DNM1L
IGF1
DMD
MAPK1
ATRX
NGF
SLC18A2
STXBP1
SOX2
H19
ENG
ZEB2
PI4KA
ACE
ABCD1
ATP1A3
HRAS
UCHL1
VEGFA
WFS1
SMARCA4
SPAST
SHH
GRIN1
ADAR
CYP27A1
ERCC1
PDGFB
PTCH1
RBBP8
SAMHD1
PMS2
CCL2
GNAO1
BLM
IL1B
SPG7
DYRK1A
VPS13A
LOC130065345
CHAT
FLNA
WRN
OPA1
OGG1
KIF1A
ARID1A
NOTCH1
NOS2
APTX
HTRA1
HLA-DRB1
TUBB4A
PAX6
ERCC8
NEFL
AQP4
CNTN2
HLA-DQB1
CCND1
SOD2-OT1
CPT2
MYCN
NAGLU
CASP8
SLC16A2
CTC1
ATP1A2
HEPACAM
KCNQ2
FANCC
MLC1
TTR
DCTN1
ACHE
CASP9
CREB1
PAH
OTC
PPT1
SDHB
C9orf72
NOS1
DHCR7
AIFM1
TWNK
HSPB1
CYCS
HFE
LMNB1
CTSD
CDKN1B
DNAJC6
KRIT1
MAOA
AARS1
MORC2
VRK1
NDUFS4
ACADM
GDNF
F2
FH
ACO2
STAT3
PC
NIPBL
KCNJ10
RAD50
TCF4
DNMT1
FXN
UBE3A
GCH1
GJC2
ATL1
LRP1
INSR
TP73
NLRP3
RPA1
NDE1
NTRK1
TBC1D24
NOS3
RNASEH2B
EGF
NPPA
PLK1
MTRFR
RNASEH2A
CXCR4
ZFYVE26
WWOX
MUTYH
CDK4
TOR1A
PDYN
SCARNA5
RB1
NPC2
GJA1
SLC19A3
HEXB
PIK3CG
KMT2D
PHGDH
VWF
BAX
CASK
NF2
MT-TL1
MEF2C
MPO
SLC16A1
SACS
L2HGDH
SIRT1
SLC20A2
CRPPA-AS1
MET
PRF1
PNKD
PCDH19
FGFR3
EIF2B2
POLH
POLR3A
GLS
TJP1
GTPBP2
SCN8A
TBK1
ARX
CHD7
CDK6
EIF2B5
YWHAE
SFTA3
APEX1
CRP
ANK3
CLN6
MIR17
HPRT1
ARFGEF2
DNM1
ATP5F1A
CEP164
CDK1
CCDC88C
RAC1
APOA1
FANCI
ALB
COQ8A
CERNA3
GRIN2A
FGF2
CHMP2B
HTR1A
DCAF17
SLC6A8
TPP1
TYMP
KIF5A
GSK3B
MMP9
DHFR
SUCLA2
HMOX1
GAMT
POLR1C
STK11
MIR21
PYCR2
PALB2
MIR142
SLC25A13
DLD
CLPB
NARS2
CLN3
MOCS2
SERAC1
GLUD1
SLC22A5
SYNE1
IGF1R
SMAD4
MAG
HSD17B10
SLC6A1
SORL1
RAI1
HEXA
CLDN5
L1CAM
POLR3B
LAMP2
FASLG
ABCG2
TRPV4
IKBKG
PDGFRA
ALDH7A1
KARS1
EML1
BRIP1
CACNA1C
TOPBP1
OTX2
PRRT2
ABAT
TFRC
PMM2
TYROBP
ICAM1
RYR1
MAP2K1
GNE
ACTG1
EIF2B1
CALM1
ATN1
NEFH
AFG3L2
RPS27A
CNTNAP2
ACADS
RPA2
GSTM1
CDH2
CUL4B
CSNK2A1
H3-3B
PIK3R2
MPV17
YWHAG
VARS1
EIF2AK2
ERBB4
SLC25A12
QARS1
XRCC4
GNAQ
ACVR1
HSD17B4
MALAT1
MIR34A
ATXN2
FUCA1
FARS2
RAD17
NFKB1
PLCB1
CRYAB
GUSB
AP4M1
SRC
CHRNA4
PCCA
HUWE1
TIMM8A
PRKCD
CHD4
MED12
SNCB
MTR
IFIH1
ABCA7
GNAS
KCNA1
JUN
GAPDH
MATR3
ANK2
DNMT3A
CDKL5
LGI1
SLC39A14
LDLR
SLC25A22
MAPK8
ABCC8
SNAP25
TRAPPC11
LEP
RAD9A
DEPDC5
SCN3A
SPTBN1
XRCC5
CDC42
BIN1
TDP1
CTLA4
MICU1
SIGMAR1
BARD1
CLCN2
ESR1
EARS2
MAPK10
SYNJ1
SURF1
CDK5RAP2
IBA57
MIR145
ACVRL1
DICER1
ADSL
ABCA1
CACNA1G
PCCB
DNM2
GRIA3
GLDC
SCN1B
TSEN54
PRKCG
LRPPRC
GATM
RARS1
HSP90AA1
TMEM107
KCNA2
RARS2
MAPK3
HDAC4
PDHA1
MT-ND1
SUOX
SERPINI1
CNP
BCL2L1
TUBGCP2
FOXP2
RAD51C
SYNGAP1
DDX3X
HADHA
SUFU
SCP2
VHL
HTRA2
UBB
NSD1
SLC39A8
HERC2
NES
NFE2L2
SLC12A5
GRM1
SCO2
PDCD10
HNRNPA1
UBQLN2
HADH
CDK2
ATP7A
WDR62
BPTF
ACAD9
RNASET2
DLG4
E2F1
KAT6B
HYCC1
AKT2
CEP290
ETHE1
FLVCR2
CLN8
SOX3
PRPS1
TOP2A
MEN1
ACOX1
FANCA
TMEM106B
RAF1
ALDH5A1
ADGRB1
XPR1
MAP1B
KIF1B
SPTBN4
AIMP1
GPHN
KDR
ATP1A1
SMARCA2
IDUA
GJB1
ETFDH
BCAP31
SPR
PURA
HADHB
MIR125A
BSCL2
GPT2
CHRNA7
XRCC6
TRAPPC9
GSR
PMPCA
RANBP2
SMARCE1
LIG4
MOCS1
UBC
CACNA1D
HCFC1
SMARCAL1
TOP1
TECPR2
HCN1
MPC1
ASPM
RNF216
CCND2
ASS1
TAF1
GNB1
ATP6AP2
SLC25A1
POLB
LAMB1
KCNB1
VPS35
NDRG1
PON1
NGLY1
FANCL
POMC
PPM1D
OPTN
MME
CYP27B1
BCS1L
TLR4
YY1
STUB1
HGF
SP1
HNRNPR
CC2D2A
CSTB
FTO
MAPK14
SLC25A4
DYSF
TXN2
LOC126863256
NFIX
ITPR1
PNPLA6
CDH1
RFWD3
GFM1
PGK1
REEP1
SHANK3
HNRNPA2B1
CRH
NRXN1
IDS
XRCC3
OFD1
PEX6
KCNT1
SOD2
QDPR
EXOSC3
TK2
AMACR
CLN5
EZH2
USP7
MIR20A
FBXO7
GRIA2
PDP1
GBE1
RAD18
SCARB2
SLC12A2
DLAT
ALPL
NDUFV1
POLD1
MT-CYB
AAAS
PCNT
ASXL1
ARNT2
MCOLN1
YAP1
GJB2
TF
FIG4
PLAU
KIT
BRAT1
SUMF1
PDHB
RNF8
MAP2
TRIM32
HBB
DPAGT1
RAB39B
GDAP1
ABCB7
VPS11
ABCC1
OLIG2
ETFB
MT-ATP6
SNX14
PEX5
EFTUD2
ATAD3A
GSTP1
SLC52A2
NTF3
SZT2
BRCC3
LONP1
ADCY5
COL18A1
DPM1
KCNJ2
SCN9A
CST3
NDUFS7
JPH3
COQ9
NDUFS3
DMXL2
SPTLC1
TSFM
MMACHC
MT-CO3
MKS1
ARG1
CPAP
PRODH
TMEM67
MAPK8IP1
STIL
NDUFS1
ATXN3
CPS1
UBE2A
BABAM2
NR3C1
STAT1
PPP2R1A
CLU
ATXN10
CFTR
NAGS
CXCL8
BRD4
ALDH3A2
TTN
ADA
PEX1
EEF1A2
FZR1
EZR
HCRT
TUFM
CHCHD10
UCP2
HIBCH
HMGCL
FOLR1
POLG2
BAP1
DRD2
TUBA4A
CCK
HLA-B
SETD1A
SUCLG1
PSAT1
DES
MTRR
FANCG
KCNJ11
UBQLN4
FLCN
EIF2AK3
SETD2
VIM
SPART
NEK1
HMGB1
VAC14
SIX3
SMCHD1
PRKAR1A
FGF14
GM2A
GRID2
ALDH18A1
KMT2A
MYH14
CACNA1E
HSPG2
NEAT1
ITGB1
HIPK2
FBXW7
RECQL4
NHEJ1
PDCD1
BTD
ETFA
HIF1A
ADGRV1
PIK3CD
KMT2B
ZIC2
SRPX2
TGFBR2
NR4A2
EPM2A
VPS13D
EPHB4
PTK2
PML
LRP2
CAMK2A
ALS2
DGUOK
EIF2B4
PIDD1
SLC12A6
AUH
NPY
RPGRIP1L
MIR155
PTGS2
HNRNPU
COQ2
LYRM7
ELN
ST3GAL5
NEU1
POLE
CFH
THAP1
TUBA8
OPA3
CCM2
FOS
PEX10
CIC
SLC25A20
BCL11B
EPCAM
IGF2
RAD23B
GAS5
SYT1
FBXL4
HLCS
SLC9A6
KDM6A
EIF2B3
SLC6A9
RAB18
MYORG
SYN1
TBP
RFC1
NONO
LMNB2
MIR25
CACNA1B
PAK1
CD4
DDHD2
PEX2
MIR29A
ADGRB3
DPM3
SMN1
PEX26
TINF2
ALG1
ACADVL
BICD2
CACNA1H
VARS2
PEX16
MCCC1
TELO2
AGTR2
ACTA2
DNA2
DKC1
AMT
FHL1
NDUFAF2
CERS1
SMAD3
NDUFS2
ACTL6B
FEN1
FOXRED1
FASTKD2
NDUFV2
F5
RET
PECAM1
LINC02605
PPARGC1A
SLC25A19
CLCN6
DBH
PEX7
ODC1
MCCC2
CYP1B1
ZSWIM6
MARS1
TRIM8
VLDLR
MMP2
HSPA4
SOX11
TDP2
CCDC88A
DNAJC19
EIF4G1
GSS
PTS
HDAC6
AMPD2
TEK
RNF168
NOTCH2
CAMK2B
WDFY3
AHI1
CHKB
D2HGDH
RBM8A
SLC13A5
SV2A
FADD
NDUFS8
IL1A
CTSF
PPP3CA
MVK
KIF11
CALM2
NEDD4L
MFSD8
RAB3GAP2
COL4A2-AS1
SGCE
MAF
FLNC
HECW2
RNF113A
CAV1
IVD
CASR
ADNP
HMBS
NEXMIF
MT-CO2
CDKN2B-AS1
PDHX
TOP3A
ADORA1
CTNND2
PMP22
KCTD7
ADD3
COX15
CNNM2
MIR223
ITM2B
CYP1A1
VPS13B
TSPO
MPZ
RNF213
LIG3
ALMS1
MMUT
SDHAF1
JAK2
PNPT1
CBL
IFT140
VPS13C
INPP5E
AGK
PLG
CD46
SPG21
COX10
ZNF423
SEPSECS
MACF1
BMP2
RBPJ
BEST1
TJP2
PEX19
GYS1
BEX5
KDM1A
EHMT1
EPHX1
NQO1
BAG3
SMAD2
SPTBN2
DPM2
ARID1B
IQSEC2
ATXN1
SDHD
GPSM2
CNTNAP1
FAR1
MIF
SNAP29
COQ6
APAF1
MCM4
XDH
DIAPH1
ECHS1
PDE4D
FGF8
HLA-DQA1
FGF17
ANKLE2
SLC25A15
IARS2
MFF
CXCL12
SARS1
CHD2
GAL
LARS2
PNPO
MARS2
MMADHC
EDNRB
BRSK1
USP18
MLYCD
ZNF335
PPP2R2B
KCNMA1
CPOX
THBD
REN
PLEKHG2
SYNE2
LBR
MDH2
DNAJC5
AFF2
MITF
MAP4K4
DNMT3B
EDN1
CHRNB2
PRKRA
PEX11B
MEIS2
APBB1
AFG2B
TPPP
SCN5A
WNT1
GAN
FLT1
SERPINA1
UBA1
DPYSL2
KCND3
RBFOX3
RAB3GAP1
JAM2
AGT
COX5A
KCNQ3
ARHGEF9
ACY1
HTR2A
NKX6-2
RTEL1
CLTC
CTSA
FBN1
TGIF1
GLI3
SLC33A1
MYO5A
BCR
TANGO2
ALDH4A1
TMEM70
DNAJB2
XRCC2
NCAM1
PPOX
LOC106627981
PIGA
CYP2U1
CPT1A
FOXO1
ATPAF2
CDH5
PHOX2B
HMGCR
ADA2
IL4
ABRAXAS1
VAMP2
ECE1
CYFIP2
PARP2
ATP6V1B2
GTPBP3
SIRT6
SCO1
NPHP1
AGER
HDAC8
GCK
HIP1
CUL4A
RAD1
CX3CR1
SATB2
PPP1R15B
CALM3
NR2F1
ATP6V0A2
AP5Z1
PRDX1
GSN
FANCE
OPHN1
CHI3L1
HCN2
DAB1
APOB
ACOT7
SEPTIN9
TBCK
HSPA9
COX6B1
BTK
MAP2K2
COL3A1
BUB1
MEFV
KATNB1
CAD
CXCL10
MDM4
SPTLC2
NDUFA10
PPP2CA
ACAT1
ATP6AP1
AUTS2
EMD
COX20
MAOB
SLC2A3
GLI1
EPB41L1
RPS6KA3
MIR210
TNNT2
ELP1
NRG1
GARS1
CPLX1
MT-ND6
CALR
CAPN1
STX11
FOXP1
DHCR24
ASTN2
TBATA
LYN
ITPA
KANSL1
TPK1
NOX4
COQ4
PYGM
NDUFA1
GLI2
MADD
UNC13D
OGT
RYR3
ATP6V1A
MBD5
DOLK
MIR126
MIR146A
RAB7A
KCNC3
TNFRSF1A
GRIN2D
LYST
TIA1
SLX4
MT-ND5
ADPRS
MSTO1
HOTAIR
GRIA1
MT-CO1
DCC
SLC25A3
XIAP
LMX1B
MN1
NAGA
IL12A
BUB1B
MT3
NSDHL
SLC9A1
MYH9
DST
NHLRC1
AGRN
GNPTAB
LOC129998005
DNAJB6
PACS2
ASL
TSEN15
ATXN7
STING1
CTNNA1
SELENON
CYP7B1
ABCA2
DPYD
GCSH
GNRH1
HAX1
RMND1
HERC1
BCOR
MOG
DEAF1
NDUFAF6
SLC32A1
BID
SMO
GATAD2B
TUG1
BCL11A
TMX2
MYH7
MTO1
CLCN1
FMN2
CLDN11
EPO
TIMM50
ABHD12
YWHAQ
GLRX5
SPRED1
NUBPL
NPHP4
RTN4
PIGV
CTCF
SLC35A2
ROBO1
CA2
IL18
ACADSB
NSD2
TAF2
CARS2
ASNS
CHKA
CD274
PPP2R5D
SLC25A46
RBFOX1
DNAH8
FBXO31
OCRL
RTN4R
HUS1
MRPS22
SOX2-OT
PFN1
ENTPD1
PET100
TFAM
TKT
ACSF3
G6PD
TIMP3
MAGEL2
SPARC
NTRK3
ANO10
DHDDS
ADAM22
ITGAM
HSPA8
ST3GAL3
CD40LG
ALG13
CAV3
SGSH
USP9X
EPG5
PAK3
CEP120
CEP63
NDUFAF4
ADARB1
STXBP2
LZTR1
ERF
MCM7
COA8
KCND2
NUP107
MIR9-1
DLG1
TTPA
NDUFA9
PNP
PRKCA
RETREG1
TTI2
IL2
AP3B2
EMX2
ROGDI
C12orf57
RPIA
EXOSC8
LARS1
RASA1
PDE2A
FOXP3
NEIL1
SON
SLC5A7
CHRNA2
FANCM
RPL10
DRD3
SRD5A3
MT-ND2
GJB6
RTN4IP1
PHYH
YME1L1
STX1B
BMI1
SLC52A3
KANK1
HELLS
CACNA1I
HACE1
ADORA2A
PIGN
MPI
MIR221
DBN1
REV3L
CDH23
DIP2B
GLYCTK
KDM5C
DINOL
FBP1
YARS2
TP63
FN1
CDC25A
BCHE
TBX1
SCN11A
UQCRC2
TSEN2
SLC46A1
CYP46A1
EGR2
PTPN22
IRF2BPL
EPRS1
GOSR2
IER3IP1
MT-ND4
G6PC1
STAT2
ISCU
NAT8L
GPC3
MIR132
CRB2
MIR133B
EMC1
TSPAN7
INF2
SLC5A6
ITCH
ECM1
NFU1
TTC19
WASHC5
RNASEH1
GSTT1
COL6A1
ABCC9
SPP1
POLR2A
ADAMTS13
PAX2
PPP1CA
DBT
TCTN2
TRIO
HDAC9
NDUFS6
CACNB4
UNC80
POU3F4
FOXO3
CHGA
PEX13
CDKN1C
GDI1
TRPS1
CLSPN
DTNBP1
TACO1
CRADD
HIVEP2
RLBP1
SLC37A4
MEGF10
PEX3
SPRTN
DCLRE1C
PCDH12
FLNB
LOC126806658
CCNB1
PDE10A
BCAN
TNFSF10
NRXN2
TWIST1
TMEM126B
CLPP
TRIP12
PLAT
SIL1
SLC19A2
PTN
LPL
CFAP410
NDUFAF5
AP4B1
SMARCA5
PGR-AS1
TIMMDC1
REST
TMEM216
CACNA2D2
SDHC
PVT1
TGFB2
ATP5PO
PEX12
SGCA
PUS1
HIC1
IL17A
KIFBP
ALX4
XPNPEP3
NDUFA12
AXIN1
HNRNPDL
IL1RAPL1
UBA5
UIMC1
NADK2
BCKDHA
CUL3
NPHP3
NLGN3
COL6A2
GTF2H5
SLC4A4
ATF2
KIF1C
LINGO1
KATNIP
ACTA1
GRIP1
NDUFA11
MYT1L
PHF6
HINT1
TOMM40
SDCCAG8
SARS2
ATP2A2
POGZ
VCAM1
SLCO1C1
BIRC5
TAT
FRRS1L
MYO6
FANCB
SETD5
CTBP1
MIR7-3HG
CASP2
EOMES
RPL11
PHC1
FLVCR1
NIPA1
PVALB
RPS3
STAMBP
TMEM165
BLTP1
KIF14
PLEC
DPYS
ATG7
CDC25C
LIPT1
CHD8
WDR73
MTFMT
IGHMBP2
AQP2
MAD2L2
SYN3
COX4I1
VAPB
IKBKB
AIP
COA7
DDHD1
NLGN4X
PUS3
RRM1
MAPRE2
IRS1
IL12B
CELF2
AQP1
PTCHD1
SOS1
RYR2
C11orf65
MAST1
PEX14
SST
ATP8A2
TYR
BMP7
ATP2B2
SNRPN
CSF3
NDUFB9
RAB27A
CAPN3
MYOT
ARHGEF10
HSPB8
DNAJC13
IL13
TNFSF11
STIM1
COL6A3
ITGB3
TGFBR1
IQSEC1
SLCO1A2
CEP152
BOLA3
SERPINE1
AP4S1
PRDM8
CC2D1A
MIR140
DISC1
PSMC3
TNNI3
ESCO2
CD40
POU3F3
POLI
NTHL1
UFM1
DLG3
NDUFA13
BMP6
MIRLET7C
MT-ATP8
ZBTB18
NAA10
FAT4
ARHGAP31
ASH1L
HPCA
NUS1
CNTN1
NTF4
MAT1A
CYB5R3
INVS
LOC130056175
MIR34C
ELAC2
MIR326
ALDH2
MIAT
UNG
WT1
CDK5R1
TRIT1
PQBP1
UMPS
KCTD17
CSF1
MID1
SLC30A10
GLRA1
HNRNPL
XK
WARS2
CLP1
CEP135
AIMP2
TRRAP
CKM
PNMA2
B2M
[truncated: 7,353 more rows]

## Sheet: Table S5
Table S5. 161 common elements related to "PFOA and PFOS" and "Brain damage".
Gene name
SLC27A1
RXRA
UGT1A4
KAT2A
FFAR1
GABRB3
GABRA5
GABRA4
GABRB2
PANK1
SCD
DAO
AKR1C2
ANP32A
SLC6A15
SLC27A5
FABP4
GABRA6
EIF4EBP1
PPIP5K2
GABRG2
HCAR1
RARA
RXRB
KCNK4
SLC1A5
GABRA1
ALOX5
GRIK2
HAAO
RARB
GRIK1
SLC7A11
EIF4E
GCN1
FA2H
SLC1A2
PCSK6
AR
GRIK5
FABP3
SMPD1
FAAH
GABRA3
AKR1C1
FGF1
ASAH1
FASN
FFAR3
GBA2
LPAR2
FABP1
CYP26B1
GAD1
CD36
APEH
PCBP1
SLC23A2
GABARAPL2
DNASE2
FABP5
GLB1
FURIN
FADS2
SLC27A4
FOLH1
GABARAP
GABRR1
VDR
GPRC5B
GABBR1
GSTO1
GBA1
DDC
NCOR2
GABRR2
GABRD
IL4I1
TAOK1
BCAT2
ACSL1
PARK7
PPARG
FADS1
OAT
TAOK2
NMNAT1
CYP3A4
SLC7A5
GIGYF2
HDAC3
ELOVL4
ALKBH1
ACSL4
ASIC3
ALOX15
GSTO2
SLC1A1
SLC1A4
TAOK3
SLC10A2
KAT2B
HMMR
SLC17A5
CYP26A1
HDAC1
KLRK1
SLC1A3
GABRB1
ASIC1
FABP2
PRDX6
BCKDHB
HPD
GABRA2
CD33
KCNK3
PRAP1
RARG
PANK3
GRIK3
GOT2
RPLP2
MAN2B1
ELOVL7
CRBN
ACSL3
HDAC2
PIPOX
PANK2
GABBR2
PPIP5K1
ACSL6
MDH1
GABARAPL1
TACC3
LIPA
ALAD
LPAR1
ACP1
ORM1
NAAA
FABP7
ELOVL5
GAD2
ELOVL1
CD22
AGPAT2
SLC7A3
BCAT1
GAA
ERBB2
SLC10A1
RPSA
KCNK9
GPBAR1
TYRP1
MGAM
NR1H4
SHBG
SLC7A8
